# Supplementary material
Source: Royal Society of Chemistry journal article supplement (doi:10.1039/d6fo00232c)
Supplement: d6fo00232c1.pdf [file d6fo00232c1.pdf]

**Table S1. The diet composition**

| Ingredients (g/kg)       | NG                        | HG                         | HG-L                       | HG-H                       |
|--------------------------|---------------------------|----------------------------|----------------------------|----------------------------|
|                          | Control diet<br>(TP23402) | High fat diet<br>(TP23400) | High fat diet<br>(TP23400) | High fat diet<br>(TP23400) |
| Dihydromyricetin         | 0                         | 0                          | 0.5                        | 1                          |
| Casein                   | 195                       | 195                        | 195                        | 195                        |
| Maltodextrin             | 56                        | 225                        | 225                        | 225                        |
| Sucrose                  | 55                        | 89                         | 89                         | 89                         |
| Corn starch              | 479                       | 0                          | 0                          | 0                          |
| Soybean Oil              | 33                        | 33                         | 33                         | 33                         |
| Lard                     | 25                        | 301                        | 301                        | 301                        |
| Cellulose                | 69                        | 69                         | 69                         | 69                         |
| Mineral Mix (M1021)      | 68                        | 68                         | 68                         | 68                         |
| Vitamin Mix (V1010)      | 14                        | 14                         | 14                         | 14                         |
| L-Cystine                | 3                         | 3                          | 3                          | 3                          |
| Choline Bitartrate       | 3                         | 3                          | 3                          | 3                          |
| TBHQ                     | 0.067                     | 0.067                      | 0.067                      | 0.067                      |
| Energy, kcal/g           | 3.8                       | 5.1                        | 5.1                        | 5.1                        |
| % kcal from Protein      | 14%                       | 14%                        | 14%                        | 14%                        |
| % kcal from Carbohydrate | 76%                       | 26%                        | 26%                        | 26%                        |
| % kcal from Fat          | 10%                       | 60%                        | 60%                        | 60%                        |

**Table S2. Whole blood analysis**

| group                      | NG              | HG              | HG-L            | HG-H            |
|----------------------------|-----------------|-----------------|-----------------|-----------------|
| WBC ( $10^3/\mu\text{l}$ ) | 4.90 ± 1.50     | 5.00 ± 1.87     | 5.73 ± 2.05     | 4.53 ± 1.22     |
| RBC ( $10^3/\mu\text{l}$ ) | 7.20 ± 0.34     | 7.51 ± 0.55     | 7.59 ± 0.33     | 7.29 ± 0.36     |
| HGB (g/dL)                 | 104.17 ± 8.23   | 108.67 ± 9.24   | 112.67 ± 8.23   | 105.00 ± 4.77   |
| HCT (%)                    | 0.36 ± 0.03     | 0.38 ± 0.03     | 0.39 ± 0.02     | 0.37 ± 0.19     |
| MCV (fL)                   | 50.27 ± 0.96    | 51.00 ± 0.56    | 51.19 ± 1.12    | 50.71 ± 0.52    |
| MCH (pg)                   | 12.92 ± 3.36    | 14.47 ± 0.21    | 14.52 ± 0.59    | 14.39 ± 0.25    |
| MCHC(g/dL)                 | 256.50 ± 6.52   | 283.50 ± 1.97   | 283.67 ± 6.02   | 283.89 ± 3.48   |
| PLT ( $10^3/\mu\text{l}$ ) | 736.50 ± 237.33 | 908.50 ± 139.05 | 870.67 ± 105.27 | 951.89 ± 127.28 |
| LYM (%)                    | 0.78 ± 0.14     | 0.79 ± 0.11     | 0.88 ± 0.04     | 0.80 ± 0.11     |
| LYM ( $10^3/\mu\text{l}$ ) | 3.50 ± 2.36     | 4.10 ± 1.82     | 5.02 ± 1.87     | 3.60 ± 0.99     |
| RDW-SD (fL)                | 27.72 ± 0.59    | 27.72 ± 0.36    | 28.02 ± 0.55    | 28.09 ± 0.42    |
| RDW-cv (%)                 | 0.12 ± 0.01     | 0.12 ± 0.01     | 0.12 ± 0.01     | 0.12 ± 0.01     |
| PDW (fL)                   | 6.95 ± 0.30     | 6.95 ± 0.64     | 6.67 ± 0.23     | 6.78 ± 0.20     |
| MPV9(fL)                   | 6.27 ± 0.15     | 6.23 ± 0.40     | 6.03 ± 0.18     | 6.16 ± 0.15     |

The data are expressed as the mean ± SD.(n=14); White blood cells (WBC), red blood cells (RBC), Hemoglobin (HGB), Hematocrit (HCT), mean corpuscular volume

(MCV), mean corpuscular hemoglobin (MCH), Platelet (PLT), Lymphocytes (LYM), red cell distribution width (RDW), platelet distribution width (PDW), and mean platelet volume (MPV).

**Table S3. Detailed configurations and grid box parameters for molecular docking simulations.**

| Target Protein | Center Coordinates (x, y, z) | Grid Box Size (Å) (x, y, z) | Number of Poses | Best Binding Affinity (kcal/mol) |
|----------------|------------------------------|-----------------------------|-----------------|----------------------------------|
| PAR-1          | (-7.4, -8.8, 59.0)           | 29.0 × 20.0 × 21.0          | 15              | -9.50                            |
| GPVI           | (21.0, 17.3, 32.2)           | 19.0 × 20.0 × 21.0          | 15              | -5.90                            |
| COX-1          | (-21.6, -41.1, 3.2)          | 24.0 × 24.0 × 20.0          | 15              | -7.30                            |
| NOX-2          | (144.9, 141.8, 162.8)        | 24.0 × 24.0 × 44.0          | 15              | -8.50                            |
| AR             | (21.1, -4.6, 20.8)           | 24.0 × 26.0 × 39.0          | 15              | -7.70                            |

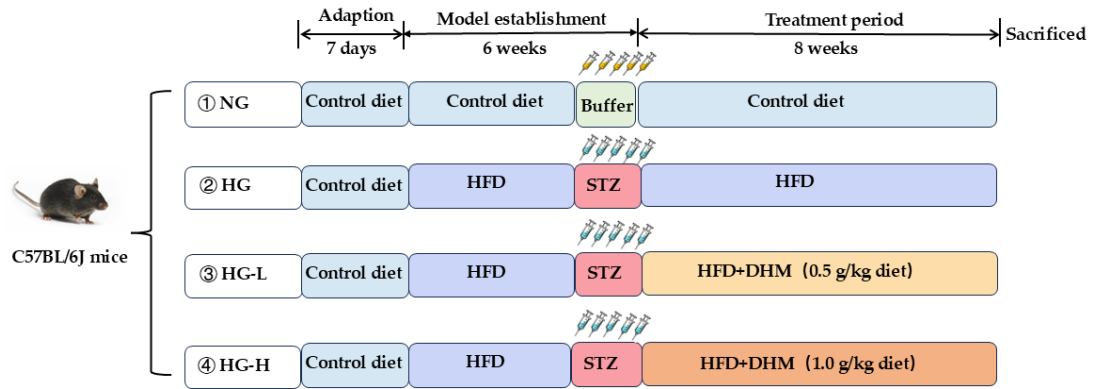

**Figure S1. Flow chart of the animal experiment procedures.**

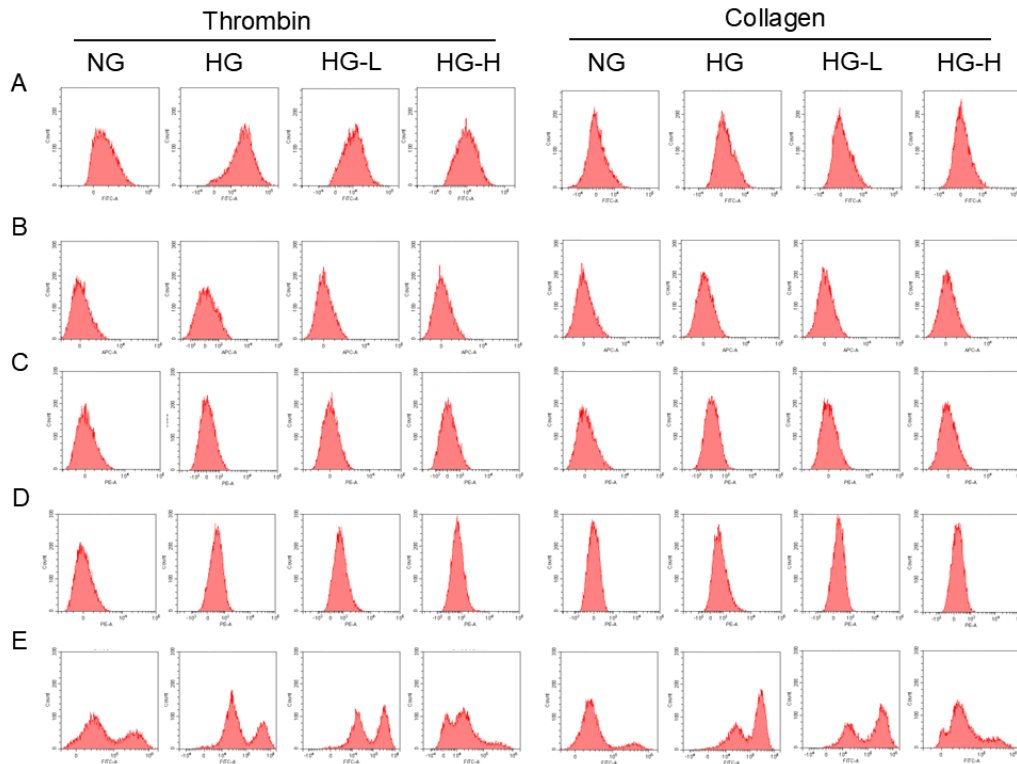

**Figure S2. Representative flow cytometry histograms of platelet activation markers.**

(A-C) Representative histograms showing the fluorescence intensity distributions of (A) CD62P, (B) CD63, and CD40L on the surface of platelets from different groups. (D-E) Representative histograms of JON/A binding (D) and ROS (E) generation in platelet stimulated with thrombin and collagen.

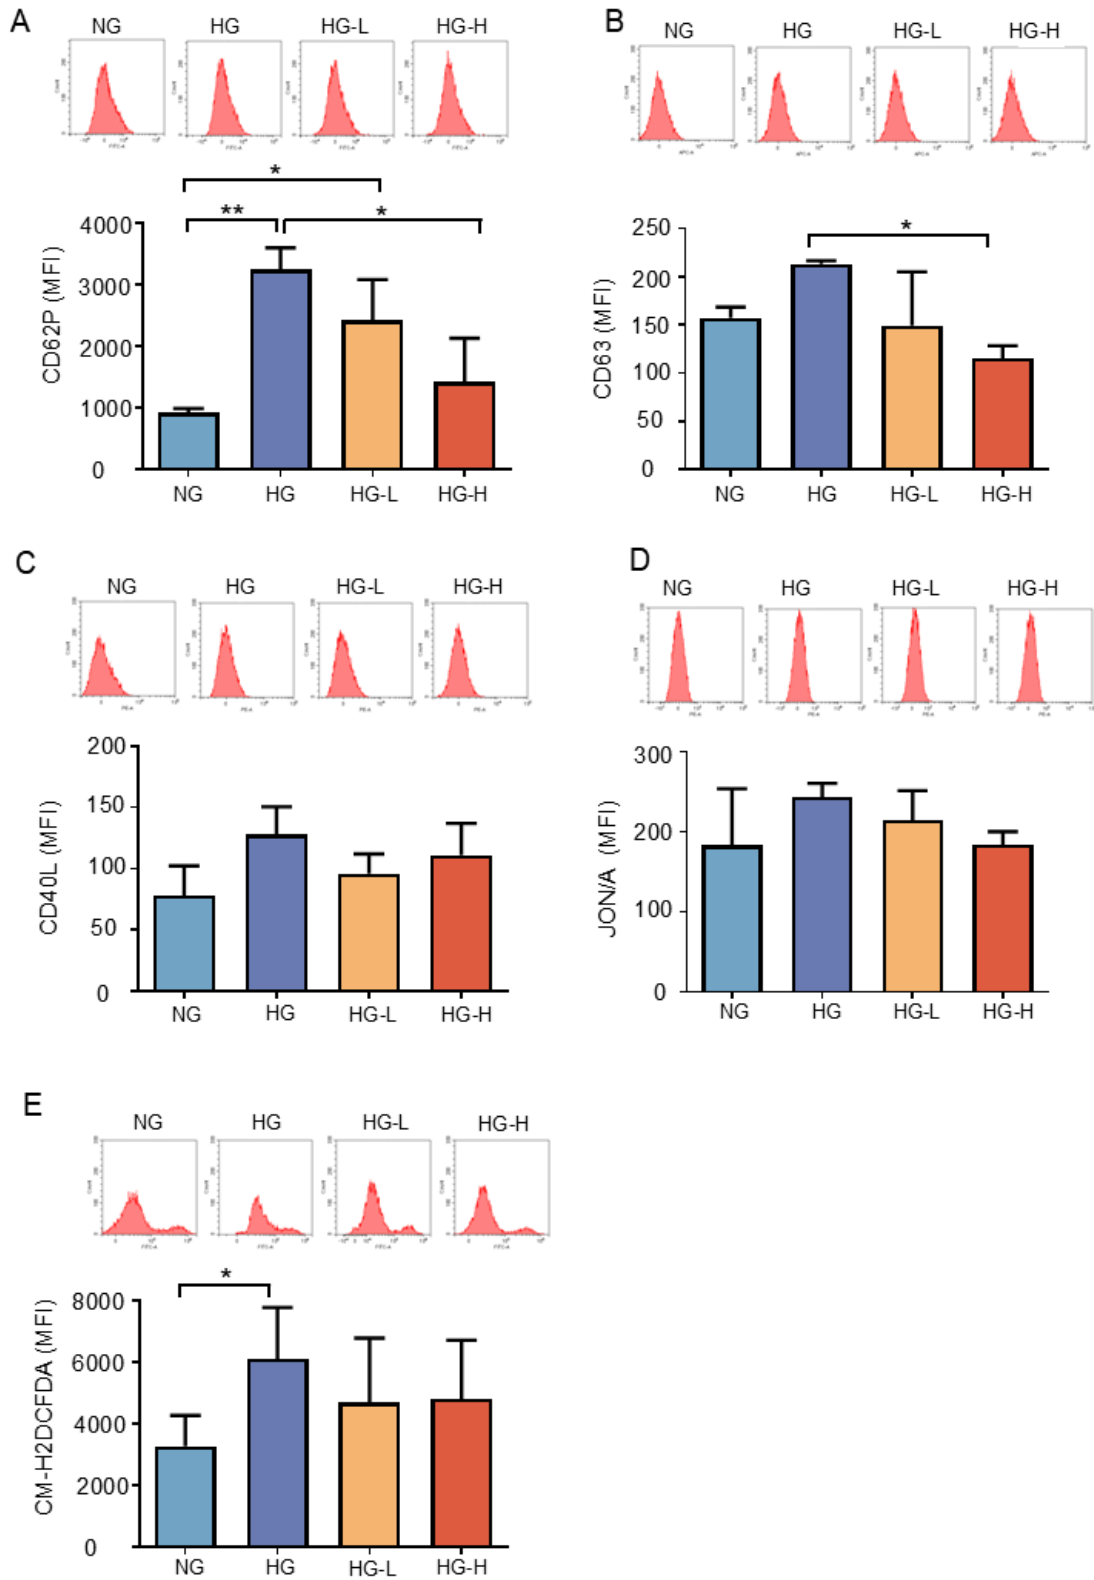

**Figure S3. Effects of DHM on the expression of platelet activation markers and ROS formation in resting platelets.**

Gel-filtered platelets were isolated from T2DM mice and incubated with FITC-conjugated anti-mouse CD62P antibody, FITC-conjugated anti-mouse CD63 antibody, PE-conjugated anti-mouse CD40L antibody or PE-conjugated JON/A antibody. Flow

cytometric analysis was performed to assess the expression of CD62P (A), CD63 (B), CD40L (C), integrin  $\alpha$ IIb $\beta$ 3 activation (D), and intraplatelet ROS formation (E) in resting platelets. Data are presented as the mean  $\pm$  SD (n = 7). \*  $p < 0.05$ , \*\*  $p < 0.01$ .
